# Supplementary material for: Versatile and efficient genome editing with Neisseria cinerea Cas9
Source: PubMed Central journal article supplement (PMC9701194; doi:10.1038/s42003-022-04258-z), 2022-11-26
Supplement: 42003_2022_4258_MOESM2_ESM.pdf [file 42003_2022_4258_MOESM2_ESM.pdf]

## **Supplementary Information**

**Versatile and efficient genome editing with *Neisseria cinerea* Cas9**

Zhiquan Liu<sup>1#</sup>, Siyu Chen<sup>1#</sup>, Wanhua xie<sup>2</sup>, Hao Yu<sup>1</sup>, Liangxue Lai<sup>1,3,4,5\*</sup>, Zhanjun Li<sup>1\*</sup>

```

Nme1Cas9 1 MAAFKPNSTINYILGLDIGIASVGVAMVEIDEEENPRLIDLGVRFERAEVPKTGDLSLAAARRLARSVRRLTRRAHRLRTRRLLKREGVLQAADFEN 100
NcCas9 1 MAAFKPNPMNYILGLDIGIASVGVAMVEIDEEENPRLIDLGVRFERAEVPKTGDLSLAAARRLARSVRRLTRRAHRLRTRRLLKREGVLQAADFEN 100
Nme2Cas9 1 MAAFKPNPIINYILGLDIGIASVGVAMVEIDEEENPRLIDLGVRFERAEVPKTGDLSLAAARRLARSVRRLTRRAHRLRTRRLLKREGVLQAADFEN 100

Nme1Cas9 101 GLIKSLPNTPWQLRAAALDRKLTPLWSAVLLHLIKHRGYLSQRKNEGETADKELGALLKGVAGNAHALQTGDFRTPAELALNKFEKESGHIRNQRSDYS 200
NcCas9 101 GLIKSLPNTPWQLRAAALDRKLTPLWSAVLLHLIKHRGYLSQRKNEGETADKELGALLKGVADNTHALQTGDFRTPAELALNKFEKESGHIRNQRSDYS 200
Nme2Cas9 101 GLIKSLPNTPWQLRAAALDRKLTPLWSAVLLHLIKHRGYLSQRKNEGETADKELGALLKGVANNAHALQTGDFRTPAELALNKFEKESGHIRNQRSDYS 200

Nme1Cas9 201 HTFSRKDLQAEILLLFEKQKEFGNPHVSGGLKEGETLLMTQRPALSGDAVQKMLGHCTFEPKAAKNTYTAERFVWLTCLNLRILEQGSERPLTDT 300
NcCas9 201 HTFNKDLQAEINLLFEKQKEFGNPHVSDGLKEGETLLMTQRPALSGDAVQKMLGHCTFEPKAAKNTYTAERFVWLTCLNLRILEQGSERPLTDT 300
Nme2Cas9 201 HTFSRKDLQAEILLLFEKQKEFGNPHVSGGLKEGETLLMTQRPALSGDAVQKMLGHCTFEPKAAKNTYTAERFVWLTCLNLRILEQGSERPLTDT 300

Nme1Cas9 301 ERATLMDEPYRKSCLTYAQARKLLGLLEDTAFFKGLRYGKDNAAEASTLMEKAYHAISRALKEKGLKDKKSPLNLSPELQDEIGTAFSLFKTDEDITGRLK 400
NcCas9 301 ERATLMDEPYRKSCLTYAQARKLLGLLEDTAFFKGLRYGKDNAAEASTLMEKAYHAISRALKEKGLKDKKSPLNLSPELQDEIGTAFSLFKTDEDITGRLK 400
Nme2Cas9 301 ERATLMDEPYRKSCLTYAQARKLLGLLEDTAFFKGLRYGKDNAAEASTLMEKAYHAISRALKEKGLKDKKSPLNLSPELQDEIGTAFSLFKTDEDITGRLK 400

Nme1Cas9 401 DRIDQPEILEALLKHSFDFKVFQISL KALRRIVPLMEQGRYDEACAEIYGDHYGKKNTEEKIYLPPIPADEIRNPVLRALSQARKVINGVRRYVYSPAR 500
NcCas9 401 DRVQPEILEALLKHSFDFKVFQISL KALRRIVPLMEQGRYDEACTEYGDHYGKKNTEEKIYLPPIPADEIRNPVLRALSQARKVINGVRRYVYSPAR 500
Nme2Cas9 401 DRVQPEILEALLKHSFDFKVFQISL KALRRIVPLMEQGRYDEACAEIYGDHYGKKNTEEKIYLPPIPADEIRNPVLRALSQARKVINGVRRYVYSPAR 500

Nme1Cas9 501 HIHIEAREVGSFSDRKEIEKRQEENRKDEKAAAKFREYFPNFVGEPSKDILKLRLEYQQHGKCLYSYSGKEINLGRLEKGYVEIDHALPFSRTWDDSF 600
NcCas9 501 HIHIEAREVGSFSDRKEIEKRQEENRKDEKSAAKFREYFPNFVGEPSKDILKLRLEYQQHGKCLYSYSGKEINLGRLEKGYVEIDHALPFSRTWDDSF 600
Nme2Cas9 501 HIHIEAREVGSFSDRKEIEKRQEENRKDEKAAAKFREYFPNFVGEPSKDILKLRLEYQQHGKCLYSYSGKEINLVRLNEKGYVEIDHALPFSRTWDDSF 600

Nme1Cas9 601 NNKVLVLGSENGKNGQTPYEYFNGKDNSREWQEFKARVETSRFPRSKKQRI L LQKFDEDFGKERNLNDTRYVNRFLCOFVADHMLLTKGKRRVYFASNG 700
NcCas9 601 NNKVLVLGSENGKNGQTPYEYFNGKDNSREWQEFKARVETSRFPRSKKQRI L LQKFDEDFGKERNLNDTRYVNRFLCOFVADHMLLTKGKRRVYFASNG 700
Nme2Cas9 601 NNKVLVLGSENGKNGQTPYEYFNGKDNSREWQEFKARVETSRFPRSKKQRI L LQKFDEDFGKERNLNDTRYVNRFLCOFVADHMLLTKGKRRVYFASNG 700

Nme1Cas9 701 QITNLLRGFWGLRKYRAENDRHHALDAVVACSTVAMQQKITRFVRYKEMNAFDGKIDKETGEVLRHQTDFPQWVEFFAQEVMI R VFGKPDGKPEFEEA 800
NcCas9 701 QITNLLRGFWGLRKYRAENDRHHALDAVVACSTVAMQQKITRFVRYKEMNAFDGKIDKETGEVLRHQTDFPQWVEFFAQEVMI R VFGKPDGKPEFEEA 800
Nme2Cas9 701 QITNLLRGFWGLRKYRAENDRHHALDAVVACSTVAMQQKITRFVRYKEMNAFDGKIDKETGEVLRHQTDFPQWVEFFAQEVMI R VFGKPDGKPEFEEA 800

Nme1Cas9 801 DTLEKLRLLAEKLSRPEAVHEVYVPLFVSRAPNRKMSGQGHMETVKSARL---LDEGVSVLRVPLTQLKLDLEKMNRE---REPKLYEALKARLEAH 895
NcCas9 801 DTPEKLRLLAEKLSRPEAVHKYVYVPLFVSRAPNRKMSGQGHMETVKSARL---LDEGVSVLRVPLTQLKLDLEKMNRE---REPKLYEALKARLEAH 895
Nme2Cas9 801 DTPEKLRLLAEKLSRPEAVHEVYVPLFVSRAPNRKMSG-AHKDITLSAKRFVKHNEKISVSRVWLTETIKLADLENMNVNYKNGREIELYEALKARLEAY 899

Nme1Cas9 896 KDDPAKAF AEPFYKYDKAGNRTQQVKAVRVEQVQKTGWVWHNHG--IADNATMVRVDVFEKGDK-----YVLVPIYSWQVAKGILPDRAVVQKDEEDW 988
NcCas9 896 KDDPAKAF AEPFYKYDKAGNRTQQVKAVRVEQVQKTGWVWHNHG--IADNATMVRVDVFEKGDK-----YVLVPIYSWQVAKGILPDRAVVQKDEEDW 988
Nme2Cas9 900 GGNKAQAFDPKDNPFYKGG--QLVKAVRVEKTESEGVLLNKKNAYTIADNGDMVRVDVFEKVDKGGKNGYFIVPIYAWQVAENILPDIDCKGYR----- 992

Nme1Cas9 989 QLIDDSFNFKFSLHPNDLVEVITKKAR--MFGYFASCHRGTGNINIRIHDLDHKIGKNGILEGIGVKTALSFQKYQIDELGKEIRPCLKRRPPVR 1082
NcCas9 989 TVMDSSEFKFVLYANDLIKLTAKKNE--FLGYEVLNRATGALDIRTHTDSTKGNKIFQSVGVTALSFQKYQIDELGKEIRPCLKRRPPVR 1082
Nme2Cas9 993 --IDDSYTCFSLHKYDLAFQKDEKSKVEFAYINQDSSNGRFYLAWHDKSKKEQ-----FRISTQNLVLIQKYQVNELGKEIRPCLKRRPPVR 1082

```

**Figure S1.** Amino acid sequence alignment of Nme1Cas9, Nme2Cas9 and NcCas9 orthologues.

Alignment was performed with Clustal Omega<sup>1</sup> and rendered using Jalview<sup>2</sup>. The PAM-interacting H1024 and N1029 residues are indicated in red.

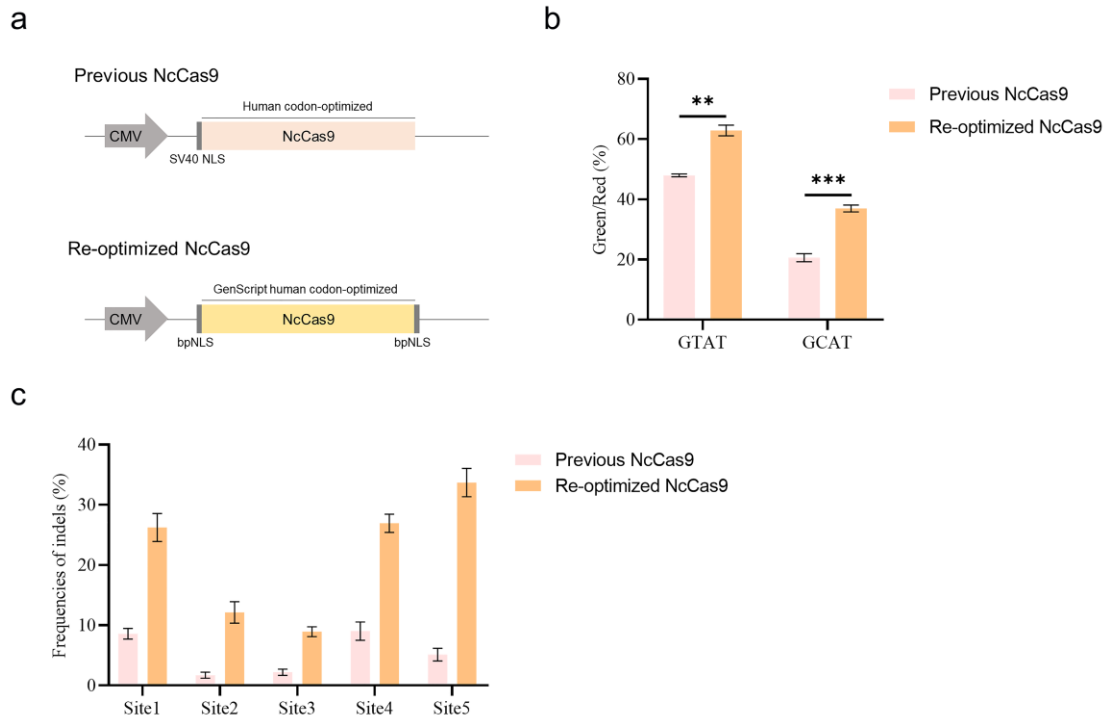

**Figure S2. (a)** Schematic architecture of previously reported NcCas9<sup>3</sup> and our re-optimized NcCas9. **(b)** Comparison of the editing efficiency by pmTmG reporter assays. Red or green represents the tdTomato or EGFP signal, respectively. **(c)** Comparison of the editing efficiency by 5 endogenous loci. Error bars indicate the s.e.m. (n=3).



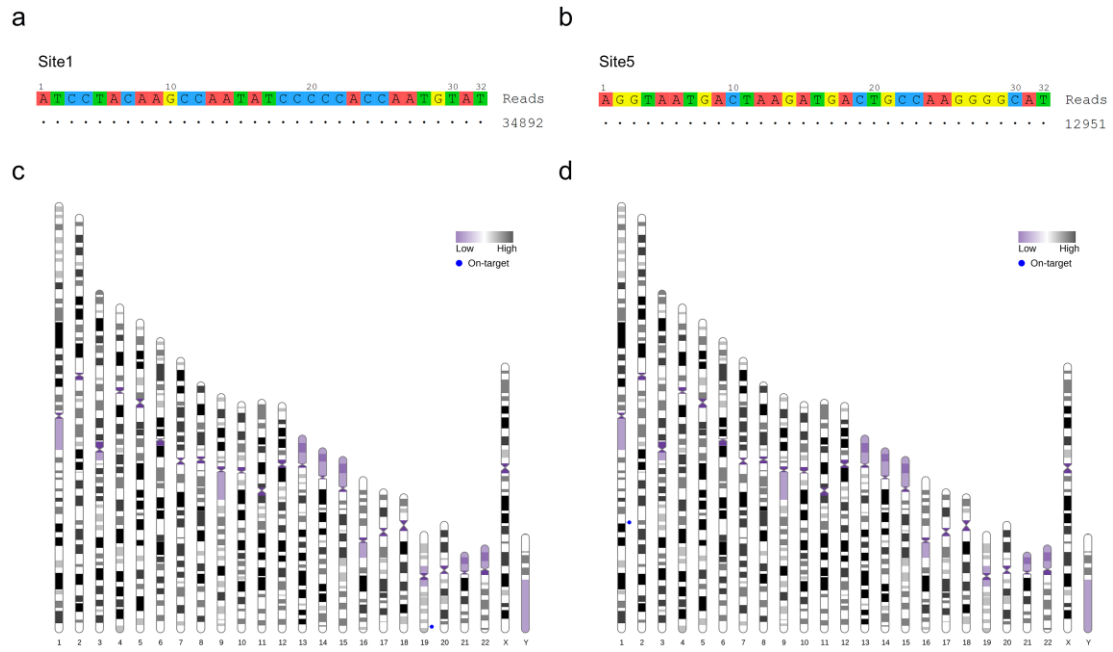

**Figure S4.** Guide-seq analysis. **(a-b)** On-target and off-target sites evaluated using GUIDE-seq with NcCas9 and sgRNA targeting Site1 **(a)** and Site5 **(b)**. **(c-d)** Visual image reveals on-target and off-target sites with dots on chromosomes in Site1 **(c)** and Site5 **(d)**.

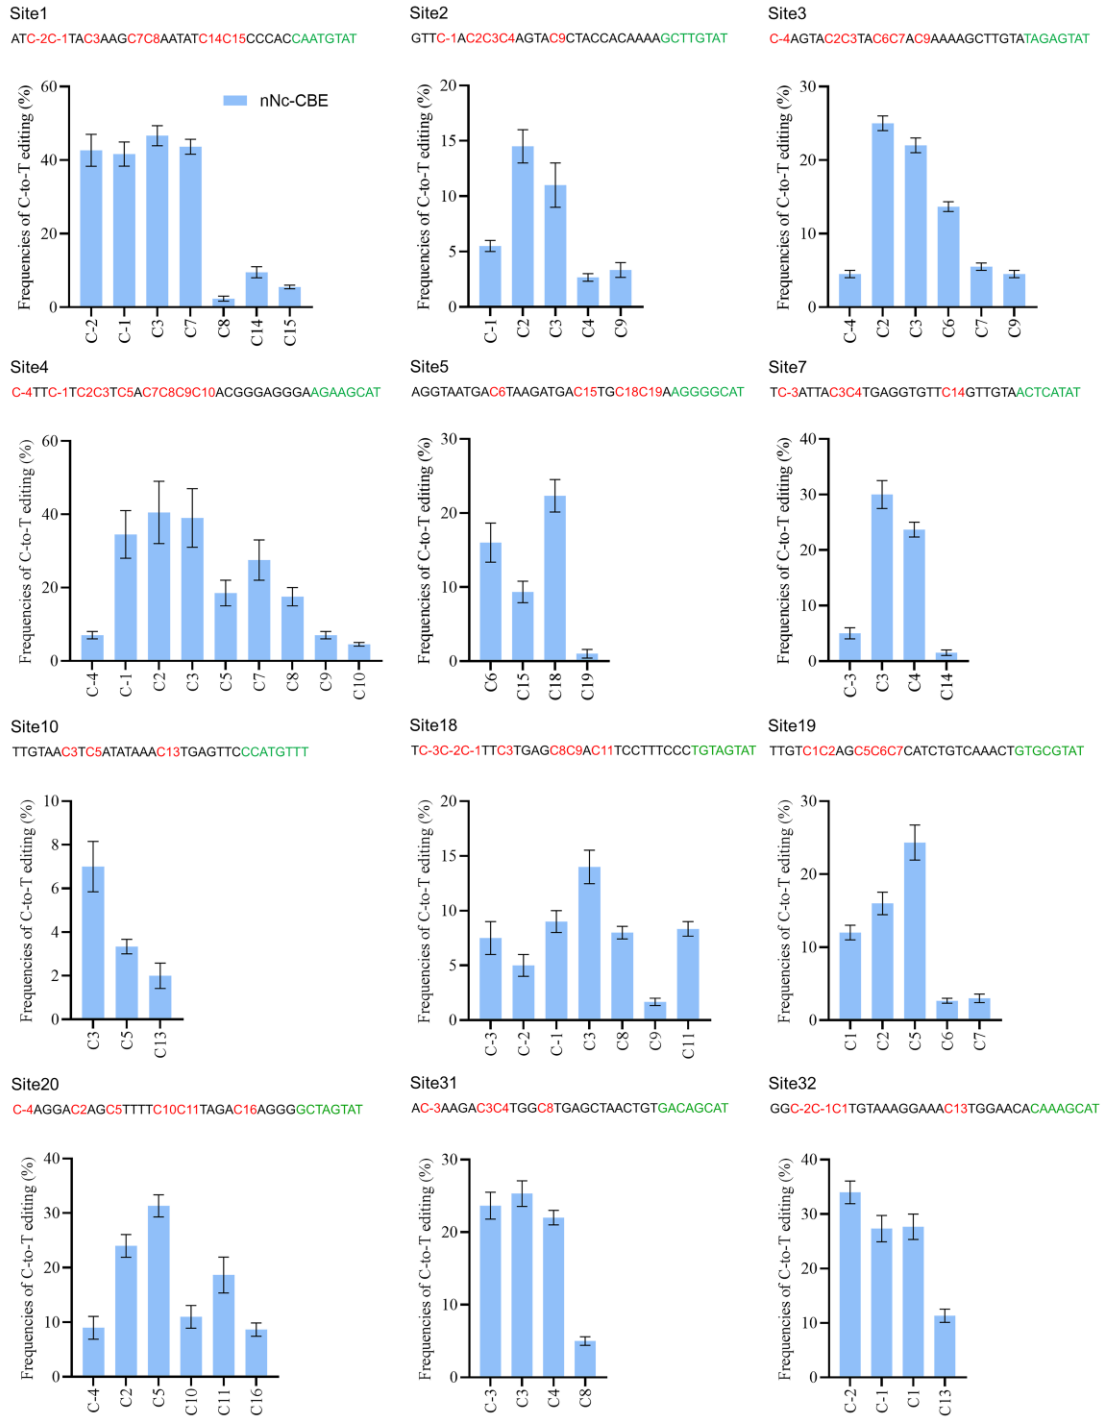

**Figure S5.** The C-to-T editing frequencies induced by nNc-CBE on each cytosine at 12 target sites.

The edited Cs and PAM are shown in red and green, respectively.

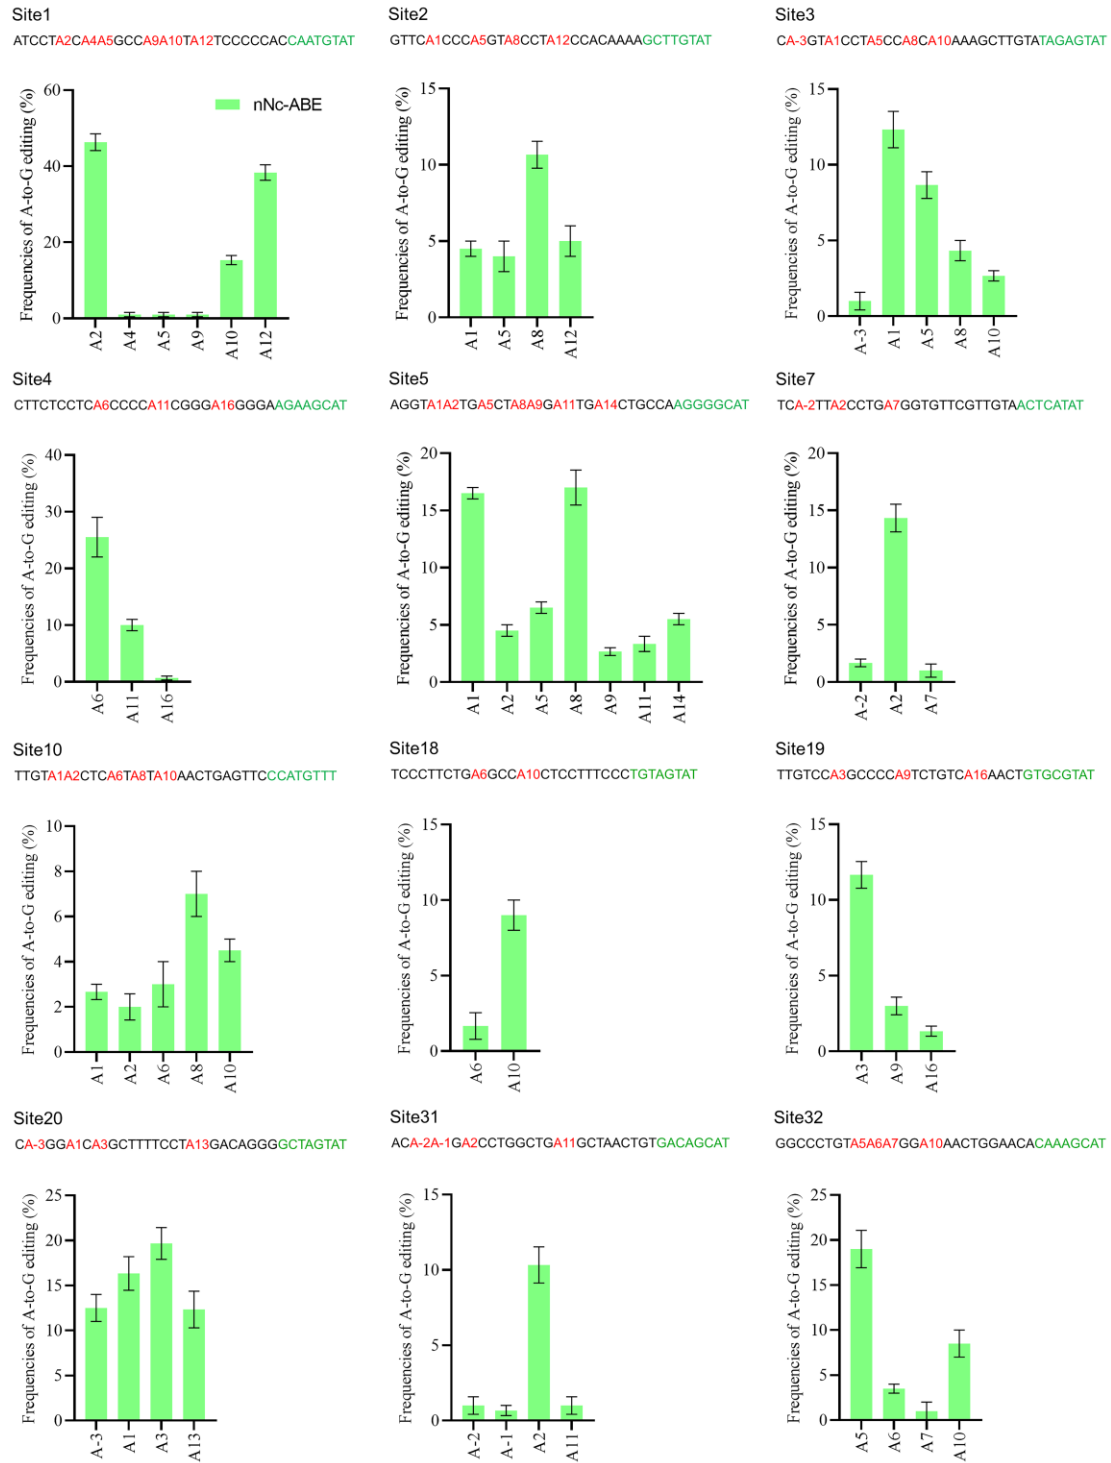

**Figure S6.** The A-to-G editing frequencies induced by nNc-ABE on each adenine at 12 target sites.

The edited As and PAM are shown in red and green, respectively.

**Table S1.** Primers used for site-directed mutation in this study.

| <b>Mutation</b> | <b>Primers (5'-3')</b>                                                 |
|-----------------|------------------------------------------------------------------------|
| nNcCas9 (D16A)  | F: ACATCCTGGGGCTGGCCATCGGAATCGCAA<br>R: GCCAGCCCCAGGATGTAGTTCATAGGGTTT |



**Table S2.** Target sites used in this study. Target sequence (black), PAM region (green).

| PAM    | Target site | Locus                            | Sequence (5'-3')                   |
|--------|-------------|----------------------------------|------------------------------------|
| N4GTAT | Site1       | <i>AAVS1</i>                     | ATCCTACAAGCCAATATCCCCCACAATGTAT    |
|        | Site2       | <i>RNF2</i>                      | G TTCACCCAGTACCTACCACAAAAAGCTTGTAT |
|        | Site3       | <i>RNF2</i>                      | CAGTACCTACCACAAAAAGCTTGTATAGAGTAT  |
|        | Site13      | <i>AAVS1</i>                     | CCAGGGGGTCTGTGAACTTTCTGACGTTGTAT   |
|        | Site14      | <i>RNF2</i>                      | AATTTATATTCAAGCATTCTGACTTCTGTAT    |
|        | Site15      | <i>CHM13 chromosome 4</i>        | TTAATAGATACTTATGAACACTAGCCTTGTAT   |
|        | Site16      | <i>CHM13 chromosome 4</i>        | ACTTACCTTATCCTGGAGTCTATGCTTAGTAT   |
|        | Site17      | <i>CHM13 chromosome 4</i>        | GAGACACATACAAGGCTAGTGTTCAATAAGTAT  |
|        | Site18      | <i>CHM13 chromosome 4</i>        | TCCCTTCTGAGCCACTCCTTTCCCTGTAGTAT   |
|        | Site19      | <i>VISTA hs267</i>               | TTGTCCAGCCCCATCTGTCAAAGTGTGCGTAT   |
|        | Site20      | <i>LINC01509</i>                 | CAGGACAGCTTTTCCTAGACAGGGGCTAGTAT   |
|        | Site21      | <i>LINC01509</i>                 | CTCCAGCCCAGCCAAACTTGTCACCAGTAT     |
|        | Site22      | <i>DYRK1A</i>                    | CCTCTAACTAACCAGGTAAGTTCATGGAGTAT   |
|        | Site23      | <i>DYRK1A</i>                    | ACTCAACACAACAGTTATGTTTTAATGGTAT    |
|        | Site24      | <i>DYRK1A</i>                    | TAAAGGAAATATTCATATCCTAATGTTTGTAT   |
| Site25 | <i>POR</i>  | CTGGTGCACCCCAGGCTCAGTCTGCCGTGTAT |                                    |
| N4GCAT | Site4       | <i>AAVS1</i>                     | CTTCTCCTCACCCCACGGGAGGGAAGAAGCAT   |
|        | Site5       | <i>RNF2</i>                      | AGGTAATGACTAAGATGACTGCCAAGGGGCAT   |
|        | Site6       | <i>FANCF</i>                     | GGGAGATTGACATGCATTTTCGACCAATAGCAT  |
|        | Site26      | <i>FANCF</i>                     | TGCGCCACATCCATCGGCGCTTTGGTCGGCAT   |
|        | Site27      | <i>EMX1</i>                      | AAGGGCTCCCATCACATCAACCGGTGGCGCAT   |
|        | Site28      | <i>CHM13 chromosome 4</i>        | AATGAAGTTATGATCGAAAGAATACTAAGCAT   |
|        | Site29      | <i>CHM13 chromosome 4</i>        | AACACTAGCCTTGTATGTGTCTCAGGTGGCAT   |
|        | Site30      | <i>CHM13 chromosome 4</i>        | CAGCTTCCTCGGACTTTGGGGTAGGTTTGCAT   |
|        | Site31      | <i>VISTA hs267</i>               | ACAAGACCTGGCTGAGCTAACTGTGACAGCAT   |
|        | Site32      | <i>VISTA hs267</i>               | GGCCCTGTAAAGGAAACTGGAACAACAAGCAT   |
|        | Site33      | <i>LINC01509</i>                 | AGGCCAGGCTGGAGAAGCAGAAAAAAGCAT     |
|        | Site34      | <i>LINC01509</i>                 | ACCCAGAGCCCAGTGGCTTTCAGCACCTGCAT   |
|        | Site35      | <i>DYRK1A</i>                    | TTATCTTCTGTAGGAGGAGAGACTTCAGCAT    |
|        | Site36      | <i>DYRK1A</i>                    | ACGGTGCAAGCCGAACAGATGAAGTTTGCAT    |
| Site37 | <i>POR</i>  | CGGCCTCACCCCTGGTCTCCCCTTCCAGCAT  |                                    |
| Site38 | <i>POR</i>  | GCCCATCTCCCCATGTACACCTGGCCGCAT   |                                    |
| N4ATAT | Site7       | <i>RNF2</i>                      | TCATTACCTGAGGTGTTTCGTTGTAACATCATAT |
|        | Site8       | <i>RNF2</i>                      | CCAACATACAGAAGTCAGGAATGCTTGAATAT   |
|        | Site9       | <i>RNF2</i>                      | TAAAAATGTATCCCAGTTTACACGTCTCATAT   |
|        | Site39      | <i>CHM13 chromosome 4</i>        | AAGCATAGACTCCAGGATAAGGTAAGTAATAT   |
|        | Site40      | <i>CHM13 chromosome 4</i>        | TTGTATGTGTCTCAGGTGGCATGAGGCAATAT   |
|        | Site41      | <i>VISTA hs267</i>               | AGTACCACCAGTTTTATGAAGAAAATGATAT    |
|        | Site42      | <i>DYRK1A</i>                    | CTAAAGTTCTTATTTAAGGAACCATTAGATAT   |
|        | Site43      | <i>DYRK1A</i>                    | AGATATGTCAAATGATACAAACATTAGGATAT   |

|        |         |               |                                   |
|--------|---------|---------------|-----------------------------------|
| N4GTTT | Site10  | <i>RNF2</i>   | TTGTAAGTCATATAAACTGAGTTCCCATGTTT  |
|        | Site11  | <i>RNF2</i>   | ATTTATTACTCTATGTTCTATTTAAGTTT     |
|        | Site12  | <i>RNF2</i>   | AGTTTTTCATGTTCTAAAAATGTATCCCAGTTT |
|        | Site44  | <i>EMX1</i>   | TCAGGCCCTTCCTCCTCCAGCTTCTGCCGTTT  |
|        | Site45  | <i>EMX1</i>   | AGCAGCAAGCAGCACTCTGCCCTCGTGGGTTT  |
|        | Site46  | <i>DYRK1A</i> | TAAGTGTGTGTTGAGTAACATATACCTGTTT   |
|        | Site47  | <i>DYRK1A</i> | TAACATATACCTGTTTGTAGTTAGAAAAGTTT  |
|        | Site48  | <i>DYRK1A</i> | TCGCCAGCCAAACATAAGTGACCAACAGGTTT  |
| N4GYAT | Tyr-1   | <i>Tyr</i>    | TAATGATATCAACATCTACGACCTCTTTGTAT  |
|        | Tyr-2   | <i>Tyr</i>    | TCAACATCTACGACCTCTTTGTATGGATGCAT  |
|        | Pcsk9-1 | <i>Pcsk9</i>  | GGAAGATGGAAGCAGCCAGGTGGAGGTGTAT   |
|        | Pcsk9-2 | <i>Pcsk9</i>  | GAGGAAGACTCCTTTGTCTTCGCCAGAGCAT   |

**Table S3.** Primers used for genotyping in this study.

| Primers                | Sequence (5'-3')                                  | Product size (bp) | Target sites                        |
|------------------------|---------------------------------------------------|-------------------|-------------------------------------|
| AAVS1-F:<br>AAVS1-R:   | GCAGTCGCCTTGTGATTTG<br>GCGTTTCTCCTTGACATTCTTT     | 391               | Site1, 4, 13                        |
| RNF2-F:<br>RNF2-R:     | GTCTTCCTTGGTGCCTTATCA<br>TGGTGGGACACATACATTCAAG   | 524               | Site2, 3, 5, 7-12, 14               |
| FANCF-F:<br>FANCF-R:   | ATCTGCTCTCCCTCCACTAA<br>GGCCTGGAAGTTTCGCTAAT      | 483               | Site6                               |
| CHM13-F:<br>CHM13-R:   | CATCTTCTCCGCAGACAGAAATA<br>TCCTGCCCTTAGGTCAAATAAC | 465               | Site15-18, 28-30, 39, 40            |
| VISTA-F:<br>VISTA-R:   | GGACGTCTGCCAATATGTAA<br>GCATTAATCCACAGCAACACC     | 455               | Site19, 31, 32, 41                  |
| LINC-F:<br>LINC-R:     | GAAACGCCCATGCAATTAGTC<br>ATCACTTTCTGGCCTCAGTTT    | 443               | Site20, 21, 33, 34                  |
| DYRK1A-F:<br>DYRK1A-R: | GGAGCTGGTCTGTTGGAGAA<br>TCCAATCCATAATCCCACGTT     | 692               | Site22-24, 35, 36, 42,<br>43, 46-48 |
| POR-F:<br>POR-R:       | CTCCCCTGCTTCTTGTCTGAT<br>ACAGGTCGTGGACTCACA       | 380               | Site 25, 37, 38                     |
| EMX1-F:<br>EMX1-R:     | CCTTCTGTGAATGTTAGACCCA<br>TGCTTGTCCCTCTGTCAATG    | 520               | Site27, 44, 45                      |
| Tyr-F:<br>Tyr-R:       | CAGTGCTCAGGCAACTTCAT<br>CGACCTCCCAAGTACTCATCT     | 497               | Tyr-1, Tyr-2                        |
| Pcsk9-F1:<br>Pcsk9-R1: | CCCCTCCTTGCTGTAAGATT<br>CACACTTGCTCGCCTGAT        | 445               | Pcsk9-1                             |
| Pcsk9-F2:<br>Pcsk9-R2: | CCCAGCCAGAGAGAAATGAG<br>GACTAAGACAGGAAGGGATGAAG   | 489               | Pcsk9-2                             |

## Supplementary Note 1

Within the sequences below, NcCas9 sequence is in gray and bpNLS sequences are in green.

### Amino acid sequence of NcCas9.

MKRTADGSEFESPKKKRKVAAFKPNPMNYILGLDIGIASVGWAIVEIDEEENPIRLIDLGVR  
VFERA EVPKTGDSLAAARRLARSVRLTRRRRAHLLRARRLLKREGVLQAADFENGLI  
KSLPNTPWQLRAAALDRKLTPLEWSAVLLHLIKHRGYLSQRKNEGETADKELGALLKGV  
ADNTHALQTGDFRTPAELALNKFEEKSGHIRNQRGDYSHTFNRKDLQAEINLLFEKQKEF  
GNPHVSDGLKEGIETLLMTQRPALSGDAVQKMLGHCTFEPTPKAAKNTYTAERFVWLT  
KLNNLRILEQGSERPLTDTERATLMDEPYRKSCLTYAQARKLLDLDDETAFFKGLRYGKDN  
AEASTLMEMKAYHAISRALKKEGLKDKKSPNLSPQLQDEIGTAFSLFKTDEDITGRLKDR  
VQPEILEALLKHISFDKVFQISLKALRRIVPLMEQGNRYDEACTEYGDHYGKKNTEEKIY  
LPPIPADEIRNPVLRALSQARKVINGVVRRYGSPARIHIETAREVGKSFKDRKEIEKRQEE  
NRKDREKSAKFREYFPNFVGEPKSKDILKRLRYEQQHGKCLYSGKEINLGRNLEKGYVE  
IDHALPFSRTWDDSFNNKVLALGSENQNKGNQTPYEYFNGKDNSREWQEFKARVETSRF  
PRSKKQRILLQKFDEEDGFKERNLNDTRYINRFLCQFVADHMLLTGKGKRRVFASNGQITNL  
LRGFWGLRKVRAENDRRHALDAVVVACSTIAMQQKITRFVRYKEMNAFDGKTIDKETGE  
VLHQKAHFPQPWEFFAQEVMIRVFGKPDGKPEFEEADTPEKLRLLAEKLSSRPEAVHKY  
VTPLFISRPNRKMMSGQGHMETVKSARKLDEGISVLRVPLTQLKLDLEKMVNREREPKL  
YEALKARLEAHKDDPAKFAEPFYKYDKAGNRTQQVKAVRVEQVQKTGVVHNHNGI  
ADNATIVRVDVFEKGGKYYLVPIYSWQVAKGILPDRVVQKDEEDWTVMDDSFEFKVF  
LYANDLIKLTAKKNEFLGYFVSLNRATGAIDIRTHDSTDSTKGKNGIFQSVGVTALSFOKY  
QIDELGKEIRPCRLKKRPPVRSGGSKRTADGSEFEPKKRKV

### DNA sequence of NcCas9.

atgaaacggacagccgacggaagcagttcgagtcaccaaagaagaagcggaaagtcGCCGCCTTCAAACCAAACCC  
TATGAACTACATCCTGGGGCTGGACATCGGAATCGCAAGCGTGGGCTGGGCTATCGTG  
GAAATCGACGAGGAGGAGAACCAATCCGGCTGATCGACCTGGGCGTGAGAGTGTTT  
GAGAGGGCAGAGGTGCCAAAGACCGGCGATTCCCTGGCAGCAGCACGGAGACTGGC  
ACGGTCTGTGAGGCGCCTGACACGGAGAAGGGCACACAGACTGCTGAGGGCACGCC  
GGCTGCTGAAGAGAGAGGGCGTGCTGCAGGCAGCAGACTTCGATGAGAACGGCCTGA  
TCAAGAGCCTGCCTAATACCCCATGGCAGCTGAGAGCAGCCGCCCTGGACAGGAAGC  
TGACACCACTGGAGTGGTCCGCCGTGCTGCTGCACCTGATCAAGCACCGCGGCTACCT  
GTCTCAGCGGAAGAATGAGGGCGAGACAGCCGATAAGGAGCTGGGCGCCCTGCTGAA  
GGGAGTGGCCGACAACACACACGCACTGCAGACCGGCGACTTCGGACACCTGCAGA  
GCTGGCCCTGAATAAGTTCGAGAAGGAGAGCGGACACATCAGGAACCAGAGGGGGCGA  
CTATTCCCACACCTTCAACCGCAAGGATCTGCAGGCCGAGCTGAATCTGCTGTTTGAG  
AAGCAGAAGGAGTTCGGCAATCCTCACGTGTCCGACGGCCTGAAGGAGGGCATCGAG  
ACACTGCTGATGACCCAGAGGCCAGCCCTGTCTGGCGATGCAGTGCAGAAGATGCTG  
GGCCACTGCACATTTGAGCCCACCGAGCCTAAGGCCGCAAGAACACCTACACAGCC  
GAGAGGTTCTGTGGCTGACAAAGCTGAACAATCTGAGGATCCTGGAGCAGGGAAGC  
GAGAGGCCTCTGACCGACACAGAGAGGGCCACCCTGATGGATGAGCCATACAGGAAG

TCCAAGCTGACATATGCACAGGCAAGGAAGCTGCTGGACCTGGACGATACCGCCTTCT  
TTAAGGGCCTGAGATACGGCAAGGATAATGCCGAGGCCTCTACACTGATGGAGATGAA  
GGCCTATCACGCCATCAGCCGCGCCCTGGAGAAGGAGGGCCTGAAGGACAAGAAGTC  
TCCTCTGAACCTGAGCCCAGAGCTGCAGGATGAGATCGGCACCGCCTTTTCCCTGTTC  
AAGACCGACGAGGACATCACAGGCCGCCTGAAGGACAGGGTGCAGCCTGAGATCCTG  
GAGGCCCTGCTGAAGCACATCTCTTTTGATAAGTTCGTGCAGATCAGCCTGAAGGCC  
TGAGAAGGATCGTGCCACTGATGGAGCAGGGCAATCGCTACGACGAGGCCTGCACCG  
AGATCTACGGCGATCACTATGGCAAGAAGAACACAGAGGAGAAGATCTATCTGCCCC  
TATCCAGCCGACGAGATCAGAAATCCAGTGGTGCTGAGGGCCCTGAGCCAGGCACG  
CAAAGTGATCAACGGAGTGGTGCGCCGGTACGGCTCCCCGCAAGGATCCACATCGA  
GACAGCCAGAGAAGTGGGCAAGTCTTTTAAGGACCGGAAGGAGATCGAGAAGAGAC  
AGGAGGAGAATAGAAAGGATAGGGAGAAGAGCGCCGCAAGTTCAGGGAGTACTTTC  
CCAACTTCGTGGGCGAGCCTAAGTCCAAGGACATCCTGAAGCTGCGCCTGTACGAGCA  
GCAGCACGGCAAGTGTCTGTATAGCGGCAAGGAGATCAACCTGGGCCGGCTGAATGA  
GAAGGGCTATGTGGAGATCGATCACGCCCTGCCCTTTAGCAGAACCTGGGACGATTCC  
TTCAACAATAAGGTGCTGGCCCTGGGCTCTGAGAACCAGAATAAGGGCAATCAGACAC  
CATACGAGTATTTCAACGGCAAGGACAATAGCAGGGAGTGGCAGGAGTTTAAGGCAA  
GGGTGGAGACAAGCAGGTTCCCACGGTCTAAGAAGCAGCGGATCCTGCTGCAGAAGT  
TTGACGAGGATGGCTTCAAGGAGAGAAACCTGAATGACACCAGATACATCAACAGGTT  
TCTGTGCCAGTTCGTGGCCGATCACATGCTGCTGACCGGCAAGGGCAAGAGAAGGGT  
GTTTGCCTCCAACGGCCAGATCACAAATCTGCTGAGGGGCTTCTGGGGCCTGAGAAAG  
GTGAGGGCAGAGAATGACAGGCACCACGCACTGGATGCAGTGGTGGTGGCATGTAGC  
ACCATCGCCATGCAGCAGAAGATCACACGCTTTGTGCGGTATAAGGAGATGAACGCCT  
TCGACGGCAAGACCATCGATAAGGAGACAGGGCAGGTGCTGCACCAGAAGGCCCACT  
TTCCACAGCCCTGGGAGTCTTTGCCAGGAAGTGATGATCCGGGTGTTTGGCAAGCC  
AGACGGCAAGCCGAGTTCGAGGAGGCCGATACCCAGAGAAGCTGCGGACACTGCT  
GGCAGAGAAGCTGAGCTCCAGACCTGAGGCCGTGCACAAGTACGTGACCCCTCTGTT  
CATCTCCCGCGCCCCAAATCGGAAGATGTCTGGCCAGGGCCACATGGAGACAGTGAA  
GTCTGCCAAGCGGCTGGACGAGGGCATCAGCGTGCTGAGAGTGCCCCTGACACAGCT  
GAAGCTGAAGGATCTGGAGAAGATGGTGAACCGCGAGCGGGAGCCTAAGCTGTATGA  
GGCCCTGAAGGCCAGACTGGAGGCCACAAGGACGATCCCGCAAGGCCTTTGCCGA  
GCCTTTCTACAAGTATGACAAGGCCGGCAATCGGACCCAGCAGGTGAAGGCCGTGAG  
AGTGGAGCAGGTGCAGAAGACAGGCGTGTGGGTGCACAACCACAATGGCATCGCCGA  
CAACGCCACAATCGTGCGGGTGGACGTGTTTCGAGAAGGGCGGCAAGTACTATCTGGT  
GCCAATCTACTCCTGGCAGGTGGCAAAGGGAATCCTGCCAGACAGAGCCGTGGTGCA  
GGGCAAGGACGAGGAGGATTGGACCGTGATGGACGATTCTTTCGAGTTTAAGTTCGTG  
CTGTACGCCAACGACCTGATCAAGCTGACCGCCAAGAAGAATGAGTTTCTGGGCTATT  
TCGTGTCTCTGAACAGGGCAACAGGAGCAATCGACATCAGGACCCACGACACAGATA  
GCACCAAGGGCAAGAACGGCATCTTTCAGAGCGTGGGCGTGAAGACCGCCCTGTCCT  
TCCAGAAGTATCAGATTGACGAACTGGGAAAAGAGATTAGACCCTGTAGGCTGAAAA  
AGAGACCACCTGTGAGAtctggcggctcaaaaagaaccgccagcggcagcgaattcgagccaagaagaagaggaaagt

### Supplementary references

1. Sievers F, *et al.* Fast, scalable generation of high-quality protein multiple sequence alignments using Clustal Omega. *Molecular systems biology* **7**, 539 (2011).
2. Waterhouse AM, Procter JB, Martin DM, Clamp M, Barton GJ. Jalview Version 2--a multiple sequence alignment editor and analysis workbench. *Bioinformatics (Oxford, England)* **25**, 1189-1191 (2009).
3. Ran FA, *et al.* In vivo genome editing using Staphylococcus aureus Cas9. *Nature* **520**, 186-191 (2015).
4. Zuker M. Mfold web server for nucleic acid folding and hybridization prediction. *Nucleic acids research* **31**, 3406-3415 (2003).
