# Supplementary material for: Versatile and efficient genome editing with Neisseria cinerea Cas9
Source: PubMed Central journal article supplement (PMC9701194; doi:10.1038/s42003-022-04258-z), 2022-11-26
Supplement: 42003_2022_4258_MOESM3_ESM.pdf [file 42003_2022_4258_MOESM3_ESM.pdf]

## Description of Additional Supplementary Files

**File name:** Supplementary Data 1

**Description:** The source data behind the graphs in the paper.
